# Supplementary material for: Quality of life in older adults with sensory impairments: a systematic review
Source: Springer Nature journal article supplement (doi:10.1007/s11136-018-1799-2), 2018-02-05
Supplement: MOESM1 [file 15442174]

**Supplemental table 1. Article quality scoring using modified Downs & Black instrument**

| Sources  Brief item description | 1 | 2 | 3 | 4 | 5 | 6 | 7 | 8 |
| --- | --- | --- | --- | --- | --- | --- | --- | --- |
| Chew *et al* | Chia  *et al* | Gopinath  *et al* | Hallberg  *et al* | Hawkins *et al* | Ishine  *et al* | Polku  *et al* | Wong  *et al* |
| 1. Hypothesis/aim/objective described? | 1 | 1 | 1 | 1 | 1 | 1 | 1 | 1 |
| 1. Main outcomes to be measured clearly described? | 1 | 1 | 1 | 1 | 1 | 1 | 1 | 1 |
| 1. Characteristics of the patients described? | 1 | 1 | 1 | 1 | 1 | 1 | 1 | 1 |
| 1. Distributions of confounders described? | 1 | 2 | 2 | 1 | 2 | 1 | 2 | 1 |
| 1. Main findings clearly described? | 1 | 1 | 1 | 1 | 1 | 1 | 1 | 1 |
| 1. Estimates of random variability in data? | 1 | 1 | 1 | 1 | 0 | 1 | 1 | 1 |
| 1. Described patients lost to follow-up? | 0 | 0 | 1 | 0 | 0 | 0 | 0 | 0 |
| 1. Actual probability values reported except where P value < .001? | 1 | 1 | 1 | 1 | 1 | 1 | 1 | 1 |
| 1. Subjects asked to participate representative of population? | 0 | 1 | 1 | 0 | 1 | 0 | 1 | 0 |
| 1. Subjects prepared to participate representative of population? | 0 | 0 | 0 | 0 | 0 | 0 | 0 | 0 |
| 1. Staff, places, and facilities representative of the treatment majority of patients receive? | 0 | 0 | 0 | 0 | 0 | 0 | 0 | 0 |
| 1. Any of the results based on data dredging, was this made clear? | 1 | 1 | 1 | 1 | 1 | 1 | 1 | 1 |
| 1. Statistical tests used to assess the main appropriate? | 1 | 1 | 1 | 1 | 1 | 1 | 1 | 1 |
| 1. Outcome measures valid/reliable? | 1 | 1 | 1 | 1 | 1 | 1 | 1 | 1 |
| 1. Losses of follow-up taken in to account? | 0 | 0 | 0 | 0 | 0 | 0 | 0 | 0 |
| 1. Sufficient power to detect clinically effect where P value for a difference due to chance is < 5%? | 0 | 0 | 1 | 0 | 0 | 0 | 0 | 0 |

**Supplemental table 1. Article quality scoring using modified Downs & Black instrument (Continued)**

| Sources  Brief item description | 9 | 10 | 11 | 12 | 13 | 14 | 15 | 16 |
| --- | --- | --- | --- | --- | --- | --- | --- | --- |
| Bekibele *et al* | Crews  *et al* | Dev  *et al* | Finger  *et al* | Lamoureux  *et al* | Lin  *et al* | Polack *et al* | Renaud *et al* |
| 1. Hypothesis/aim/objective described? | 1 | 1 | 1 | 1 | 1 | 1 | 1 | 1 |
| 1. Main outcomes to be measured clearly described? | 1 | 1 | 1 | 1 | 1 | 1 | 1 | 1 |
| 1. Characteristics of the patients described ? | 1 | 1 | 1 | 1 | 1 | 1 | 1 | 1 |
| 1. Distributions of confounders described? | 1 | 2 | 1 | 1 | 2 | 1 | 2 | 1 |
| 1. Main findings clearly described? | 1 | 1 | 1 | 1 | 1 | 1 | 1 | 1 |
| 1. Estimates of random variability in data? | 1 | 1 | 1 | 1 | 1 | 1 | 1 | 1 |
| 1. Described patients lost to follow-up? | 0 | 0 | 0 | 0 | 0 | 0 | 0 | 0 |
| 1. Actual probability values reported except where P value < .001? | 1 | 1 | 1 | 1 | 1 | 1 | 1 | 1 |
| 1. Subjects asked to participate representative of population? | 1 | 1 | 0 | 0 | 0 | 0 | 0 | 0 |
| 1. Subjects prepared to participate representative of population? | 0 | 0 | 0 | 0 | 0 | 0 | 0 | 0 |
| 1. Staff, places, and facilities representative of the treatment majority of patients receive? | 0 | 0 | 0 | 0 | 0 | 0 | 0 | 0 |
| 1. Any of the results based on data dredging, was this made clear? | 1 | 1 | 1 | 1 | 1 | 1 | 1 | 1 |
| 1. Statistical tests used to assess the main appropriate? | 1 | 1 | 1 | 1 | 1 | 1 | 1 | 1 |
| 1. Outcome measures valid/reliable? | 1 | 1 | 1 | 1 | 1 | 1 | 1 | 1 |
| 1. Losses of follow-up taken in to account? | 0 | 0 | 0 | 0 | 0 | 0 | 0 | 0 |
| 1. Sufficient power to detect clinically effect where P value for a difference due to chance is < 5%? | 0 | 0 | 0 | 0 | 0 | 0 | 0 | 0 |

**Supplemental table 1. Article quality scoring using modified Downs & Black instrument (Continued)**

| Sources  Brief item description | 17 | 18 | 19 | 20 | 21 | 22 | 23 |
| --- | --- | --- | --- | --- | --- | --- | --- |
| Seland *et al* | Chia  *et al* | Fischer  *et al* | Kwon  *et al* | Lopez  *et al* | Tay  *et al* | Zhang  *et al* |
| 1. Hypothesis/aim/objective described? | 1 | 1 | 1 | 1 | 1 | 1 | 1 |
| 1. Main outcomes to be measured clearly described? | 1 | 1 | 1 | 1 | 1 | 1 | 1 |
| 1. Characteristics of the patients described ? | 1 | 1 | 1 | 1 | 1 | 1 | 1 |
| 1. Distributions of confounders described? | 1 | 1 | 2 | 2 | 2 | 2 | 1 |
| 1. Main findings clearly described? | 1 | 1 | 1 | 1 | 1 | 1 | 1 |
| 1. Estimates of random variability in data? | 1 | 1 | 1 | 1 | 1 | 1 | 1 |
| 1. Described patients lost to follow-up? | 0 | 0 | 1 | 0 | 0 | 0 | 0 |
| 1. Actual probability values reported except where P value < .001? | 1 | 1 | 1 | 1 | 1 | 1 | 1 |
| 1. Subjects asked to participate representative of population? | 1 | 1 | 1 | 1 | 1 | 1 | 1 |
| 1. Subjects prepared to participate representative of population? | 0 | 0 | 0 | 0 | 0 | 0 | 0 |
| 1. Staff, places, and facilities representative of the treatment majority of patients receive? | 0 | 0 | 0 | 0 | 0 | 0 | 0 |
| 1. Any of the results based on data dredging, was this made clear? | 1 | 1 | 1 | 1 | 1 | 1 | 1 |
| 1. Statistical tests used to assess the main appropriate? | 1 | 1 | 1 | 1 | 1 | 1 | 1 |
| 1. Outcome measures valid/reliable? | 1 | 1 | 1 | 1 | 1 | 1 | 1 |
| 1. Losses of follow-up taken in to account? | 0 | 0 | 0 | 0 | 0 | 0 | 0 |
| 1. Sufficient power to detect clinically effect where P value for a difference due to chance is < 5%? | 0 | 0 | 0 | 0 | 0 | 0 | 0 |
